# Supplementary material for: Trebouxia lynnae sp. nov. (Former Trebouxia sp. TR9): Biology and Biogeography of an Epitome Lichen Symbiotic Microalga
Source: MDPI journal article supplement (doi:10.3390/biology11081196), 2022-08-10
Supplement: s1 [file s1]

**Supplementary Table S1.** GenBank accession numbers for the species/OTUs included in the phylogenetic analyses.

| Tree Label      | OTU / GenBank strain                           | ITS      | cox2     | rbcL     |
|-----------------|------------------------------------------------|----------|----------|----------|
| A01 (100)       | A01 / <i>Trebouxia</i> sp. OTU A01 ID 100      | KR912355 | KR914200 | KR914275 |
| A01 (637)       | A01 / <i>Trebouxia</i> sp. OTU A01 ID 637      | KR912367 | KR914202 |          |
| A02 (8677)      | A02 / <i>Trebouxia</i> sp. OTU A02 ID 8677     | KR912585 | KR914206 | KR914285 |
| A02 (6018)      | A02 / <i>Trebouxia</i> sp. OTU A02 ID 6018     | KR912646 | KR914207 | KR914287 |
| A03 (4085)      | A03 / <i>Trebouxia</i> sp. OTU A03 ID 4085     | KR912778 | KR914209 | KR914290 |
| A03 (6771)      | A03 / <i>Trebouxia</i> sp. OTU A03 ID 6771     | KR912827 | KR914210 | KR914293 |
| A04 (575)       | A04 / <i>Trebouxia</i> sp. OTU A04 ID 575      | KR913187 | KR914231 | KR914320 |
| A04 (5041)      | A04 / <i>Trebouxia</i> sp. OTU A04 ID 5041     | KR912904 | KR914214 | KR914297 |
| A05 (4042)      | A05 / <i>Trebouxia</i> sp. OTU A05 ID 4042     | KR912912 | -        | KR914299 |
| A05 (8723)      | A05 / <i>Trebouxia</i> sp. OTU A05 ID 8723     | KR912930 | -        | KR914300 |
| A06 (6621)      | A06 / <i>Trebouxia</i> sp. OTU A06 ID 6621     | KR912987 | KR914215 | KR914301 |
| A06 (286)       | A06 / <i>Trebouxia</i> sp. OTU A06 ID 286      | KR913027 | KR914219 | KR914305 |
| A07 (219)       | A07 / <i>Trebouxia</i> sp. OTU A07 ID 219      | KR913043 | KR914220 | KR914306 |
| A07 (4284)      | A07 / <i>Trebouxia</i> sp. OTU A07 ID 4284     | KR913090 | KR914223 | KR914310 |
| A08 (5168)      | A08 / <i>Trebouxia</i> sp. OTU A08 ID 5168     | KR913102 | KR914225 | KR914312 |
| A08 (6024)      | A08 / <i>Trebouxia</i> sp. OTU A08 ID 6024     | KR913123 | KR914228 | KR914315 |
| A09 (1032)      | A09 / <i>Trebouxia</i> sp. OTU A09 ID 1032     | KR913169 | KR914229 | KR914317 |
| A09 (906)       | A09 / <i>Trebouxia</i> sp. OTU A09 ID 906      | KR913178 | KR914230 | KR914318 |
| A10 (575)       | A04 / <i>Trebouxia</i> sp. OTU A04 ID 575      | KR913187 | KR914231 | KR914320 |
| A11 (527)       | A11 / <i>Trebouxia</i> sp. OTU A11 ID 527      | KR913194 | KR914234 | KR914323 |
| A11 (493)       | A11 / <i>Trebouxia</i> sp. OTU A11 ID 493      | KR913196 | KR914235 | KR914324 |
| A12 (736)       | A12 / <i>Trebouxia</i> sp. OTU A12 ID 736      | KR913202 | KR914236 | KR914326 |
| A12 (127)       | A12 / <i>Trebouxia</i> sp. OTU A12 ID 127      | KR913204 | KR914237 | KR914327 |
| A13 (L1184)     | A13 / <i>Trebouxia</i> sp. 1 strain L1184      | KJ754304 | -        | KM091733 |
| A13 (SAG219-1a) | A13 / <i>Trebouxia arboricola</i> SAG 219-1a   | Z68705   | -        | AM158960 |
| A13 (AV020)     | A13 / <i>Trebouxia crenulata</i> voucher AV020 | KT819989 | -        | -        |
| A14 (170)       | A14 / <i>Trebouxia</i> sp. OTU A14 ID 170      | KR913246 | KR914256 | KR914351 |
| A14 (149)       | A14 / <i>Trebouxia</i> sp. OTU A14 ID 149      | KR913220 | KR914242 | KR914335 |
| A15 (GIGA)      | A15 / <i>Trebouxia gigantea</i>                | AJ249577 | -        | -        |
| A15 (UTEX2231)  | A15 / <i>Trebouxia gigantea</i> UTEX 2231      | AF242468 | -        | -        |
| A15 (197)       | A15 / <i>Trebouxia</i> sp. OTU A15 ID 197      | KR913223 | KR914244 | KR914337 |
| A16 (901)       | A16 / <i>Trebouxia</i> sp. OTU A16 ID 901      | KR913224 | KR914245 | KR914338 |
| A16 (452)       | A16 / <i>Trebouxia</i> sp. OTU A16 ID 452      | KR913229 | KR914249 | KR914342 |
| A17 (6714)      | A17 / <i>Trebouxia</i> sp. OTU A17 ID 6714     | KR913232 | KR914250 | KR914344 |
| A17 (1602)      | A17 / <i>Trebouxia</i> sp. OTU A17 ID 1602     | KR913235 | -        | KR914345 |
| A18 (140)       | A18 / <i>Trebouxia</i> sp. OTU A18 ID 140      | KR913237 | KR914252 | KR914347 |
| A18 (229)       | A18 / <i>Trebouxia</i> sp. OTU A18 ID 229      | KR913240 | KR914255 | KR914350 |
| A19 (3743)      | A19 / <i>Trebouxia</i> sp. OTU A19 ID 3743     | KR913242 | -        | -        |
| A20 (147)       | A20 / <i>Trebouxia</i> sp. OTU A20 ID 147      | KR913248 | KR914258 | KR914352 |
| A21 (334)       | A21 / <i>Trebouxia</i> sp. OTU A21 ID 334      | KR913250 | KR914260 | KR914354 |
| A21 (335)       | A21 / <i>Trebouxia</i> sp. OTU A21 ID 335      | KR913251 | KR914261 | KR914355 |
| A22 (007)       | A22 / <i>Trebouxia</i> sp. OTU A22 ID 007      | KR913255 | KR914263 | KR914359 |
| A22 (031)       | A22 / <i>Trebouxia</i> sp. OTU A22 ID 031      | KR913256 | KR914264 | KR914360 |

|                                                  |                                                   |                 |                 |                 |
|--------------------------------------------------|---------------------------------------------------|-----------------|-----------------|-----------------|
| A23 (SAG2009)                                    | A23 / <i>Trebouxia showmanii</i> SAG 2009         | FJ626734        |                 |                 |
| A23 (UTEX2234)                                   | A23 / <i>Trebouxia showmanii</i> UTEX 2234        | FJ626734        | -               | AB194857        |
| A25 (6698)                                       | A25 / <i>Trebouxia</i> sp. OTU A25 ID 6698        | KR913259        | KR914265        | KR914361        |
| A25 (6703)                                       | A25 / <i>Trebouxia</i> sp. OTU A25 ID 6703        | KR913260        | KR914266        | KR914362        |
| A26 (073)                                        | A26 / <i>Trebouxia</i> sp. OTU A26 ID 073         | KR913261        | KR914267        | KR914363        |
| A26 (080)                                        | A26 / <i>Trebouxia</i> sp. OTU A26 ID 080         | KR913262        | KR914268        | KR914364        |
| A27 (111)                                        | A27 / <i>Trebouxia</i> sp. OTU A27 ID 111         | KR913263        | KR914269        | KR914365        |
| A27 (110)                                        | A27 / <i>Trebouxia</i> sp. OTU A27 ID 110         | KR913264        | KR914270        | KR914366        |
| A28 (098)                                        | A28 / <i>Trebouxia</i> sp. OTU A28 ID 098         | KR913265        | KR914271        | KR914367        |
| A29 (L1739)                                      | A29 / <i>Trebouxia</i> sp. clade IV isolate L1739 | KJ754246        | -               | KM091768        |
| A29 (L1141)                                      | A29 / <i>Trebouxia</i> sp. clade IV isolate L1141 | KJ754245        | -               | KJ754346        |
| A29 (L1408)                                      | A29 / <i>Trebouxia</i> sp. clade IV isolate L1408 | KJ754241        | -               | KJ754347        |
| A30 (036)                                        | A30 / <i>Trebouxia</i> sp. OTU A30 ID 036         | KR913267        | KR914272        | KR914369        |
| A31 (030)                                        | A31 / <i>Trebouxia</i> sp. OTU A31 ID 030         | KR913268        | -               | -               |
| A32 (075)                                        | A32 / <i>Trebouxia</i> sp. OTU A32 ID 075         | KR913269        | KR914273        | KR914370        |
| A33 (P319)                                       | A33 / <i>Trebouxia decolorans</i> isolate P-319   | AJ970889        | -               | AM159504        |
| A33 (UTEXB781)                                   | A33 / <i>Trebouxia decolorans</i> UTEX B781       | FJ626728        |                 |                 |
| A33 (P121IId)                                    | A33 / <i>Trebouxia</i> sp. P-121-IId              | AJ969550        | -               | AM158967        |
| A34 (6702)                                       | A34 / <i>Trebouxia</i> sp. OTU A34 ID 6702        | KR913270        | -               | -               |
| A35 (L1383)                                      | A35 / <i>Trebouxia arboricola</i> isolate L1383   | KJ754240        | -               | KM091793        |
| A35 (AV060)                                      |                                                   | KT819918        |                 |                 |
| A36 (L101)                                       | A36 / Uncultured <i>Trebouxia</i> isolate L-101   | AJ969540        | -               | AJ969664        |
| A37 (L1107)                                      | A37 / <i>Trebouxia arboricola</i> isolate L1107   | KJ754236        | -               | -               |
| A38 (Trinkaus356a)                               | A38 / <i>Trebouxia</i> sp. Trinkaus356a           | AJ293783        | -               | -               |
| <b>A39 (ASUV44; ex <i>Trebouxia</i> sp. TR9)</b> | <b>A39 / <i>Trebouxia</i> sp. TR9 ASUV44</b>      | <b>KU716051</b> | <b>QES94804</b> | <b>QHO63910</b> |
| A40 (P10)                                        | A40 / <i>Trebouxia</i> sp. P-10                   | AJ969515        | -               | AJ969659        |
| A41 (9517)                                       | A41 / <i>Trebouxia vaga</i> voucher Kirika 9517   | MT127650        | -               | -               |
| A42 (9491)                                       | A42 / <i>Trebouxia</i> sp. A42_9491               | MT127651        | -               | -               |
| A43 (9580)                                       | A43 / <i>Trebouxia</i> sp. A43_9580               | MT127655        | -               | -               |
| A44 (9714)                                       | A44 / <i>Trebouxia</i> sp. A44_9714               | MT127659        | -               | -               |
| A45 (L174)                                       | A45 / Uncultured <i>Trebouxia</i> clone L174      | KJ576675        | -               | -               |
| A46 (ASUV142)                                    | A46 / <i>Trebouxia maresiae</i> ASUV142           | MZ724411        | MZ687826        | MZ687825        |
| A46 (P280IIaSc)                                  | A46 / <i>Trebouxia</i> sp. P-280-IIaSc            | AJ969583        | -               | AJ969660        |
| A47 (G9306)                                      | A47 / Uncultured <i>Trebouxia</i> isolate G9306   | AJ969505        | -               | AJ969662        |
| A48 (P133Ia)                                     | A48 / <i>Trebouxia</i> sp. P-133-Ia               | AJ969551        | -               | AM158961        |
| A48 (P287VIb)                                    | A48 / <i>Trebouxia</i> sp. P-287-VIb              | AJ969586        | -               | AJ969649        |
| A49 (9493)                                       | A49 / <i>Trebouxia</i> sp. A49_9493               | MT127660        | -               | -               |
| A50 (L1382)                                      | A50 / <i>Trebouxia arboricola</i> isolate L1382   | KJ754239        | -               | -               |
| A51 (P69IaSc)                                    | A51 / <i>Trebouxia</i> sp. P-69-IaSc              | AJ969534        | -               | AJ969652        |
| A52 (L2388)                                      | A52 / <i>Trebouxia</i> sp. OTU A52 ID L2388       | OM275485        | -               | -               |
| A52 (L2913)                                      | A52 / <i>Trebouxia</i> sp. OTU A52 ID L2913       | OM275539        |                 | -               |
| A53 (16_20)                                      | A53 / <i>Trebouxia</i> sp. OTU A53 ID 16 20       | OL625070        | -               |                 |
| A53 (16_21)                                      | A53 / <i>Trebouxia</i> sp. OTU A53 ID 16 21       | OL625071        |                 |                 |
| A54 (ASUV137)                                    | A54 / <i>Trebouxia</i> sp. arnoldoi ASUS137       | MT458610        |                 |                 |
| S10                                              | S10 / <i>Trebouxia</i> sp. 1 HAP01                | KJ623927        | KJ623951        | KJ623975        |

**Supplementary Table S2.** GenBank accession numbers, host, locality, and reference for the *Trebouxia* species that matched with *Trebouxia lynnae* sp. nov. in GenBank.

| GenBank code                                         | Host                         | Locality/Country                |
|------------------------------------------------------|------------------------------|---------------------------------|
| MN684424 <i>Trebouxia</i> sp.<br>TR9 isolate ASV 58  | <i>Ramalina farinacea</i>    | Castellon/Spain                 |
| MN684432 <i>Trebouxia</i> sp.<br>TR9 isolate ASV 66  | <i>Ramalina farinacea</i>    | Tenerife-Canary Island/Spain    |
| MN684412 <i>Trebouxia</i> sp.<br>TR9 isolate ASV 46  | <i>Ramalina farinacea</i>    | La Palma-Canary Island/Spain    |
| MN684389 <i>Trebouxia</i> sp.<br>TR9 isolate ASV 23  | <i>Ramalina farinacea</i>    | Tenerife-Canary Island/Spain    |
| MN684454 <i>Trebouxia</i> sp.<br>TR9 isolate ASV 88  | <i>Ramalina farinacea</i>    | Castellon/Spain                 |
| MN684473 <i>Trebouxia</i> sp.<br>TR9 isolate ASV 107 | <i>Ramalina farinacea</i>    | Tenerife-Canary Island/Spain    |
| MN684383 <i>Trebouxia</i> sp.<br>TR9 isolate ASV 17  | <i>Ramalina farinacea</i>    | La Palma-Canary Island/Spain    |
| MN684440 <i>Trebouxia</i> sp.<br>TR9 isolate ASV 74  | <i>Ramalina farinacea</i>    | Castellon/Spain                 |
| MN684452 <i>Trebouxia</i> sp.<br>TR9 isolate ASV 86  | <i>Ramalina farinacea</i>    | Tenerife-Canary Island/Spain    |
| MN684376 <i>Trebouxia</i> sp.<br>TR9 isolate ASV 10  | <i>Ramalina farinacea</i>    | Castellon/Spain                 |
| MN684423 <i>Trebouxia</i> sp.<br>TR9 isolate ASV 57  | <i>Ramalina farinacea</i>    | Tenerife-Canary Island/Spain    |
| MN684429 <i>Trebouxia</i> sp.<br>TR9 isolate ASV 63  | <i>Ramalina farinacea</i>    | La Palma-Canary Island/Spain    |
| MN684438 <i>Trebouxia</i> sp.<br>TR9 isolate ASV 72  | <i>Ramalina farinacea</i>    | Castellon/Spain                 |
| MN684419 <i>Trebouxia</i> sp.<br>TR9 isolate ASV 53  | <i>Ramalina farinacea</i>    | Tenerife-Canary Island/Spain    |
| MG687518 <i>Trebouxia</i> sp.<br>BGK-2018            | <i>Lecanographa amylacea</i> | Białowieża National Park/Poland |
| MG687515 <i>Trebouxia</i> sp.<br>BGK-2018            | <i>Lecanographa amylacea</i> | Białowieża National Park/Poland |
| MG687516 <i>Trebouxia</i> sp.<br>BGK-2018            | <i>Lecanographa amylacea</i> | Białowieża National Park/Poland |
| MG687517 <i>Trebouxia</i> sp.<br>BGK-2018            | <i>Lecanographa amylacea</i> | Uppland/Sweden                  |
| MG687513 <i>Trebouxia</i> sp.<br>BGK-2018            | <i>Lecanographa amylacea</i> | Uppland/Sweden                  |
| MG687509 <i>Trebouxia</i> sp.<br>BGK-2018            | <i>Lecanographa amylacea</i> | Uppland/Sweden                  |
| MG687508 <i>Trebouxia</i> sp.<br>BGK-2018            | <i>Lecanographa amylacea</i> | Uppland/Sweden                  |
| MG687512 <i>Trebouxia</i> sp.<br>BGK-2018            | <i>Lecanographa amylacea</i> | Uppland/Sweden                  |
| MG687507 <i>Trebouxia</i> sp.<br>BGK-2018            | <i>Lecanographa amylacea</i> | Uppland/Sweden                  |

|                                                             |                                |                                 |
|-------------------------------------------------------------|--------------------------------|---------------------------------|
| MG687514 Trebouxia sp. BGK-2018                             | <i>Lecanographa amylacea</i>   | Białowieża National Park/Poland |
| KY066417 Trebouxia sp. 8                                    | <i>Protoparmelia montagnei</i> | Almeria/Spain                   |
| KY066423 Trebouxia sp. 8                                    | <i>Protoparmelia montagnei</i> | Almeria/Spain                   |
| KY066421 Trebouxia sp. 8                                    | <i>Protoparmelia montagnei</i> | Almeria/Spain                   |
| KY066420 Trebouxia sp. 8                                    | <i>Protoparmelia montagnei</i> | Almeria/Spain                   |
| KY066422 Trebouxia sp. 8                                    | <i>Protoparmelia montagnei</i> | Almeria/Spain                   |
| KY066424 Trebouxia sp. 8                                    | <i>Protoparmelia montagnei</i> | Almeria/Spain                   |
| KM369705 Uncultured Trebouxia photobiont clone ARam9        | <i>Ramalina sp.</i>            | New Zealand                     |
| KM369706 Uncultured Trebouxia photobiont clone ARam10       | <i>Ramalina sp.</i>            | New Zealand                     |
| KF549590 Trebouxia decolorans isolate SCI-03b               | <i>Ramalina menziesii</i>      | California/USA                  |
| KF549534 Trebouxia jamesii isolate BA13-01a                 | <i>Ramalina menziesii</i>      | California/USA                  |
| KF549659 Trebouxia jamesii isolate BA12-03a                 | <i>Ramalina menziesii</i>      | California/USA                  |
| GU252182.1 Uncultured Trebouxia photobiont clone AL ITS Gu1 | <i>Ramalina farinacea</i>      | Tenerife-Canary Island/Spain    |
| GU252198.1 Uncultured Trebouxia photobiont clone AL ITS Re2 | <i>Ramalina farinacea</i>      | Tenerife-Canary Island/Spain    |
| JN980150 Uncultured Trebouxia photobiont clone S3T          | <i>Ramalina fastigiata</i>     | Spain                           |
| JN980147 Uncultured Trebouxia photobiont clone MT           | <i>Ramalina fastigiata</i>     | Spain                           |
| JN980148 Uncultured Trebouxia photobiont clone S1           | <i>Ramalina fastigiata</i>     | Spain                           |
| EF523354.1 Uncultured Trebouxia photobiont isolate 71       | <i>Ramalina farinacea</i>      | Castellon/Spain                 |
| EF523350.1 Uncultured Trebouxia photobiont isolate 67       | <i>Ramalina farinacea</i>      | Castellon/Spain                 |
| FJ418565.1 Trebouxia photobiont sp. TR9                     | <i>Ramalina farinacea</i>      | Castellon/Spain                 |
| KU716051 Trebouxia sp. TR9 26S-18S                          | <i>Ramalina farinacea</i>      | Castellon/Spain                 |
